# Supplementary material for: Interfacial engineering and chemical reconstruction of Mo/Mo2C@CoO@NC heterostructure for promoting oxygen evolution reaction
Source: Royal Society of Chemistry journal article supplement (doi:10.1039/d2dt03865j), 2023-01-01
Supplement: d2dt03865j1.pdf [file d2dt03865j1.pdf]

## Supporting Information

### Interfacial engineering and chemical reconstruction into Mo/Mo<sub>2</sub>C@CoO@NC heterostructure for promoting oxygen evolution reaction

Kai Li,<sup>a,#</sup> Sihui Pan,<sup>a,#</sup> Haiqi Zhang,<sup>a</sup> Qingqing Zhang,<sup>a</sup> Detian Wan,<sup>a</sup> Xiaojun Zeng<sup>a,\*</sup>

<sup>a</sup> School of Materials Science and Engineering, Jingdezhen Ceramic University, Jingdezhen 333403, China

\* Corresponding author, E-mail: zengxiaojun@jcu.edu.cn (X.J. Zeng)

# These authors contributed equally to this work.

#### OER process

For OER in alkaline electrolyte (pH=14), since OH<sup>-</sup> may act as an electron donor, the overall reaction scheme of OER can be expressed as:

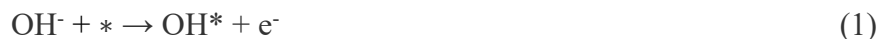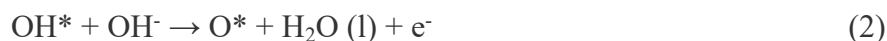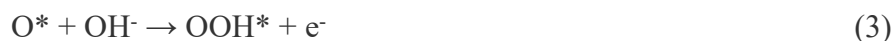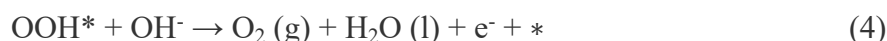

where \* represents the catalyst and active adsorption site, (l) and (g) represent the liquid and gas phases, and OH\*, O\*, and OOH\* represent the adsorbed intermediates.

## TOF calculation

To have better quantification of the activity of Mo/Mo<sub>2</sub>C@CoO@NC electrocatalysts, the turnover frequency (TOF) value was calculated from the equation:

[1]

$$\text{TOF} = (J * A) / (4F * m) \quad (5)$$

where  $J$  is the measured current density,  $A$  is the surface area of the working electrode,  $F$  is the Faraday constant (96485 C mol<sup>-1</sup>), and  $m$  is the number of moles of active materials loaded on the working electrodes. The TOF was calculated by only taking the metal ions (10.51 wt% of cobalt and 43.37 wt% of molybdenum, [Table S1](#)) in the catalysts into consideration.

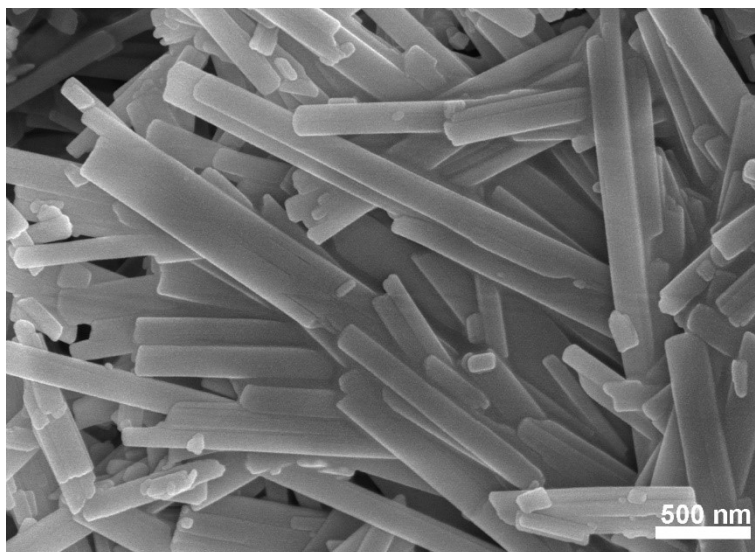

**Figure S1.** SEM images of MoO<sub>3</sub> nanoribbons.

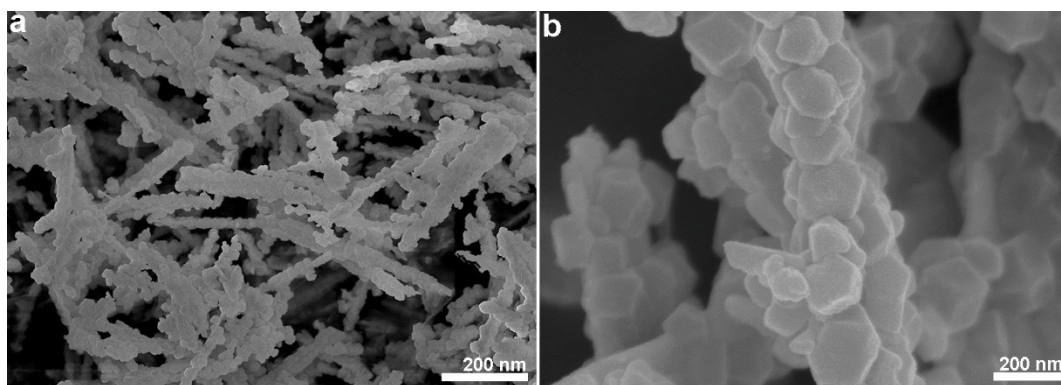

**Figure S2.** Low-magnification (a) and high-magnification (b) SEM images of MoO<sub>3</sub>@ZIF-67 heterogeneous nanoribbons.

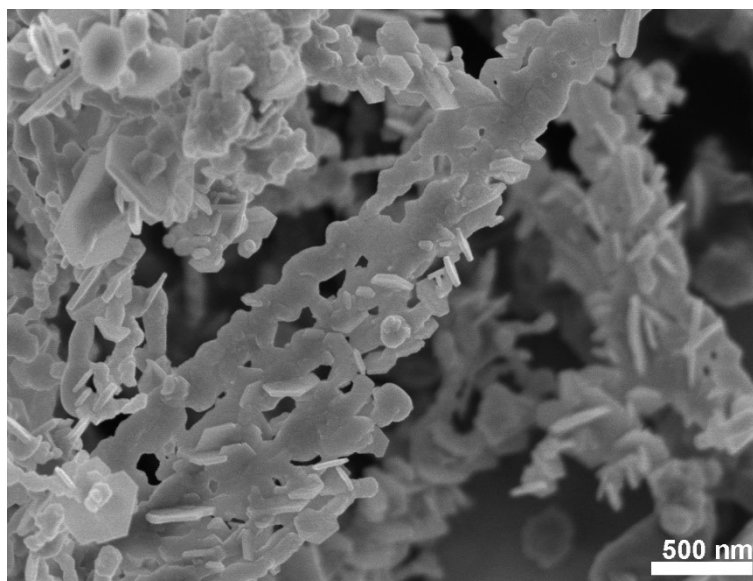

**Figure S3.** SEM images of Mo/Mo<sub>2</sub>C@CoO@NC heterostructures.

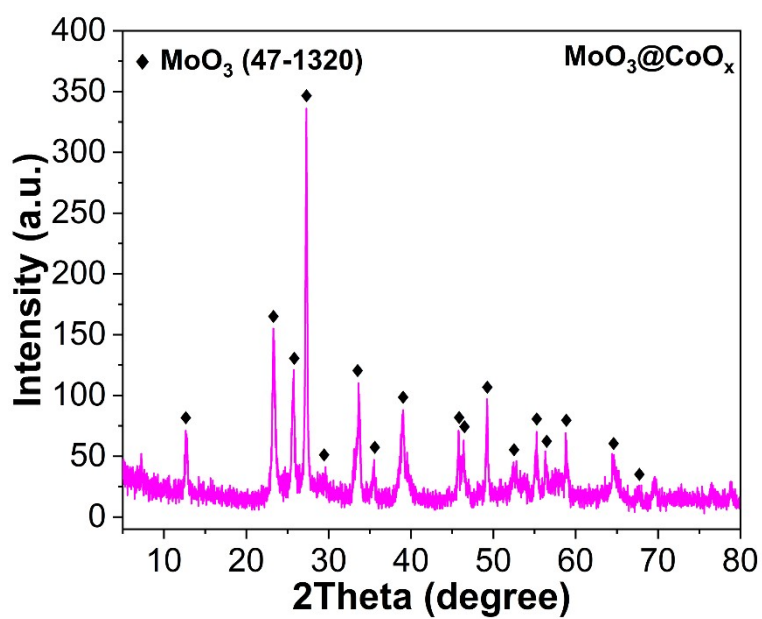

**Figure S4.** XRD patterns of MoO<sub>3</sub>@CoO<sub>x</sub> catalysts.

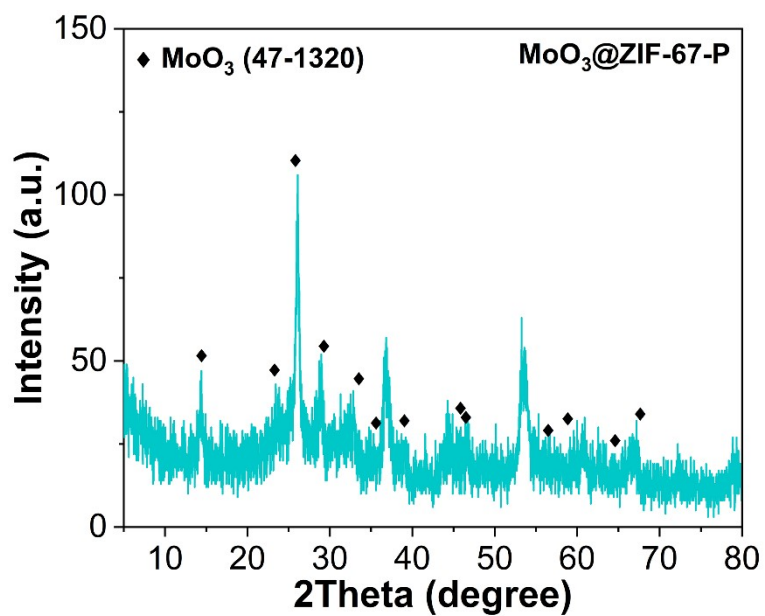

Figure S5. XRD patterns of MoO<sub>3</sub>@ZIF-67-P catalysts.

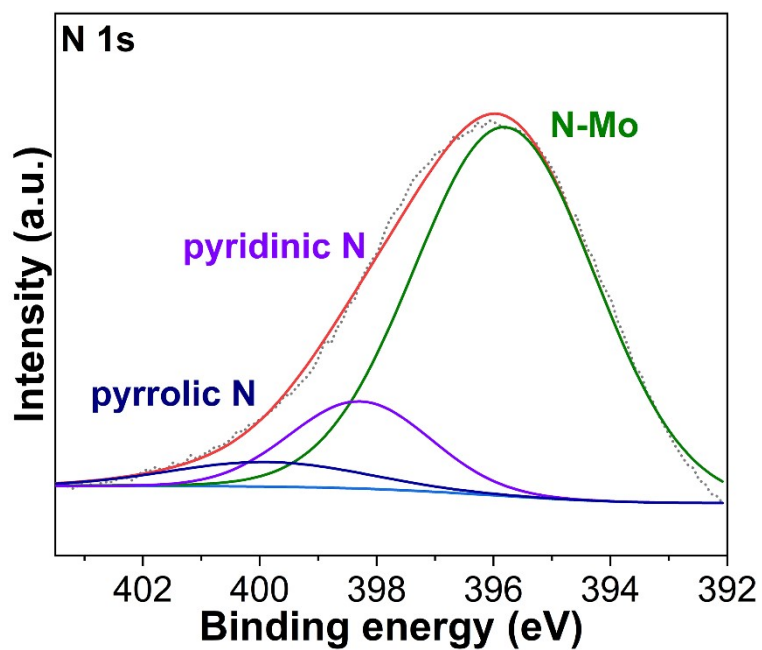

Figure S6. N 1s XPS spectra of Mo/Mo<sub>2</sub>C@CoO@NC heterostructures.

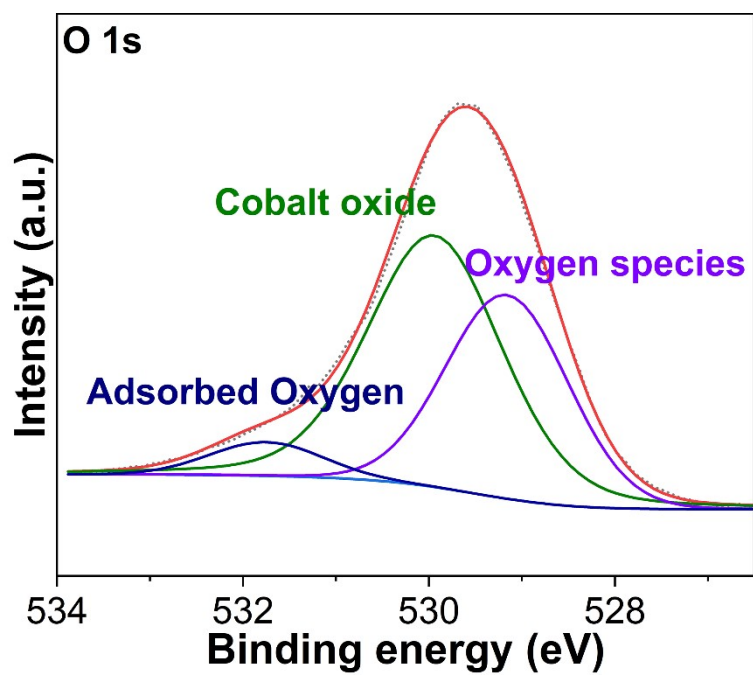

**Figure S7.** O 1s XPS spectra of Mo/Mo<sub>2</sub>C@CoO@NC heterostructures.

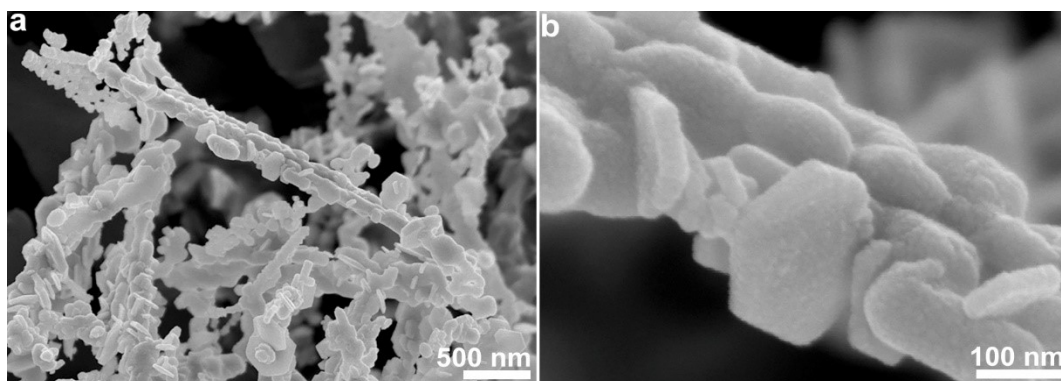

**Figure S8.** Low-magnification (a) and high-magnification (b) SEM images of Mo/Mo<sub>2</sub>C@CoO@NC heterostructures.

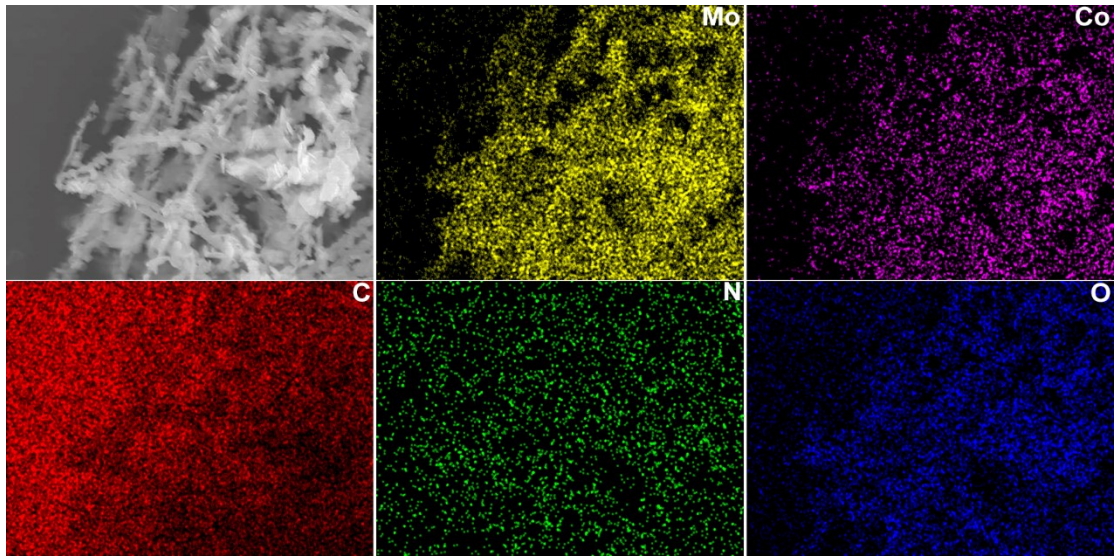

**Figure S9.** Elemental mapping images of Mo, Co, C, N, and O elements in Mo/Mo<sub>2</sub>C@CoO@NC heterostructures detected by SEM.

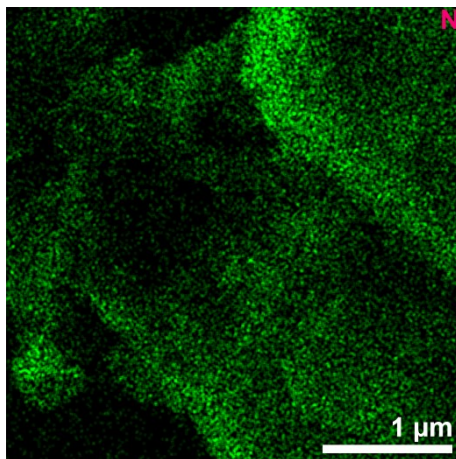

**Figure S10.** Elemental mapping images of N element in Mo/Mo<sub>2</sub>C@CoO@NC heterostructures detected by HAADF-STEM.

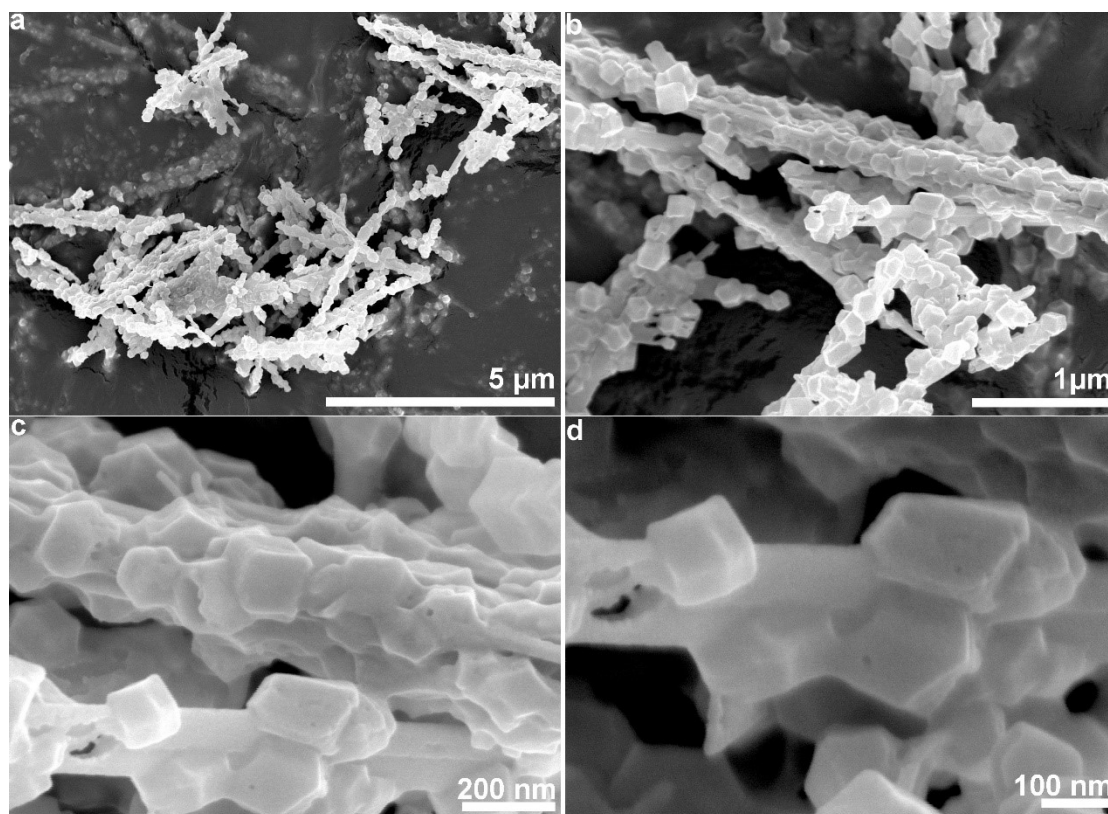

**Figure S11.** Low-magnification (a) and high-magnification (b-d) SEM images of  $\text{MoO}_3@\text{CoO}_x$  catalysts.



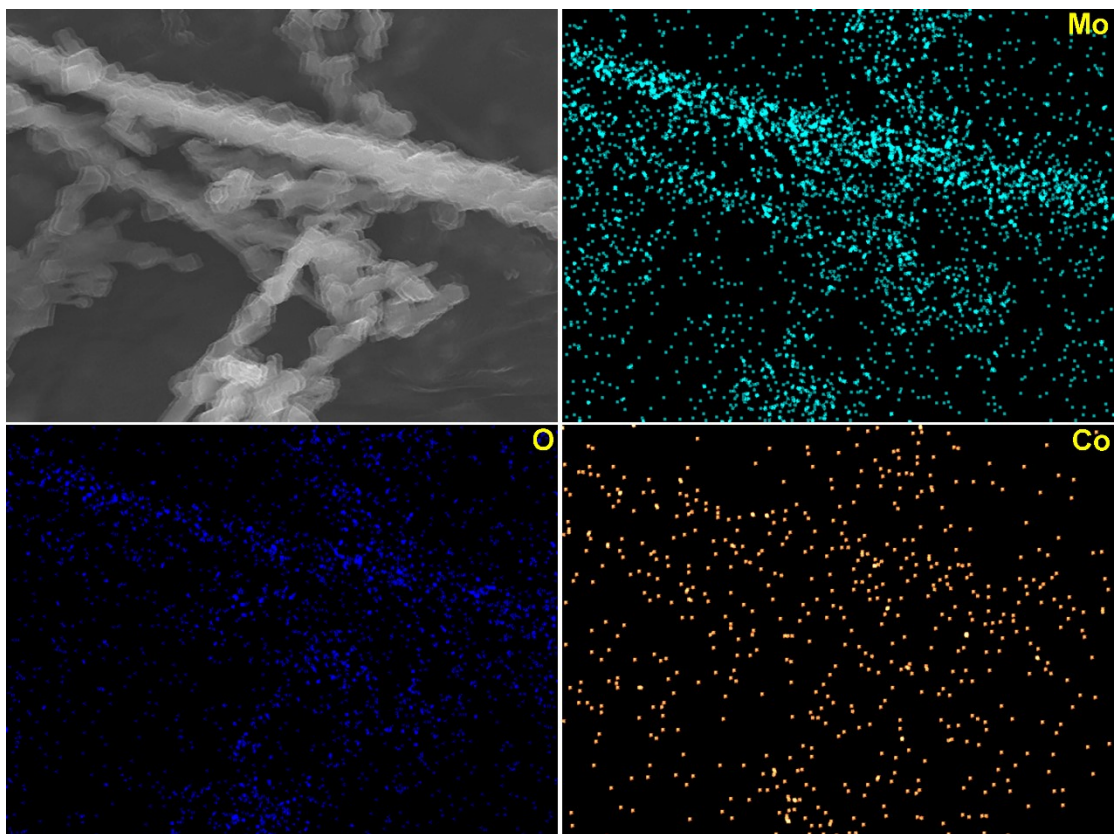

**Figure S12.** Elemental mapping images of Mo, O, and Co elements in  $\text{MoO}_3@\text{CoO}_x$  catalysts detected by SEM.

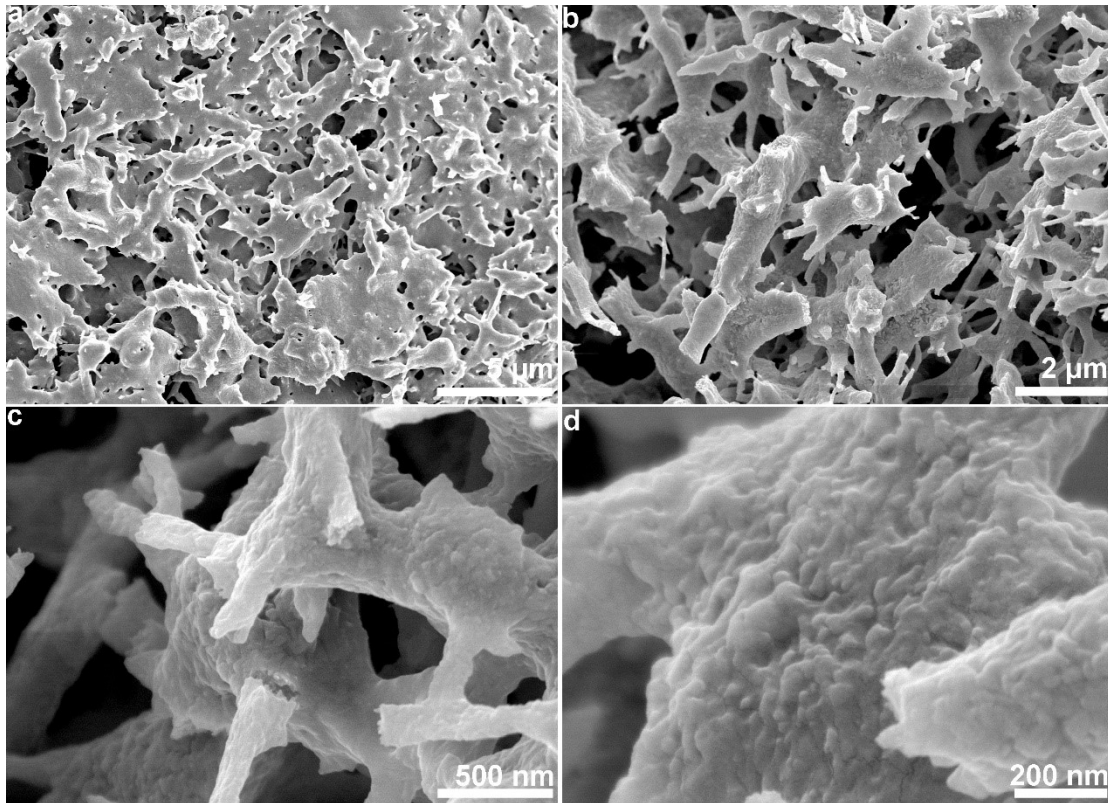

**Figure S13.** Low-magnification (a) and high-magnification (b-d) SEM images of  $\text{MoO}_3@\text{ZIF-67-P}$  catalysts.

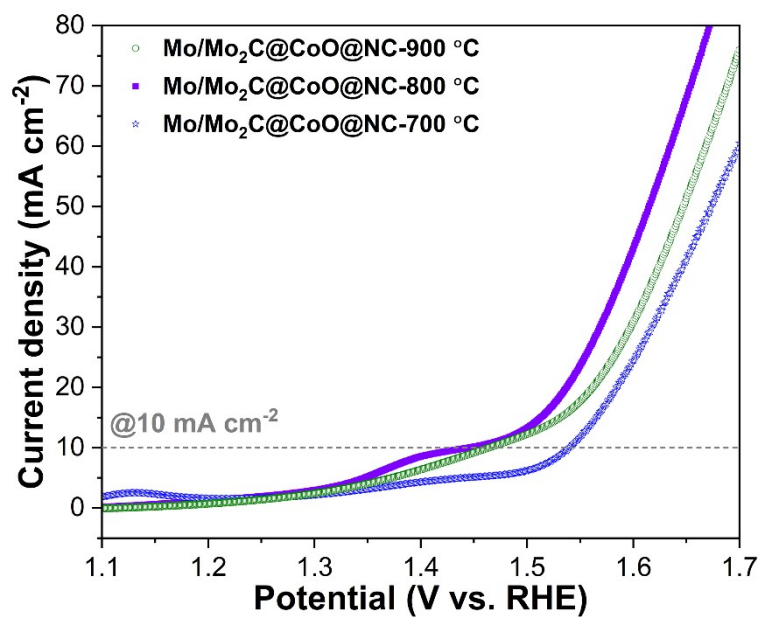

**Figure S14.** OER LSV polarization curves of  $\text{MoO}_3@\text{ZIF-67}$  heterogeneous nanoribbons heat-treated at 700 °C, 800 °C, and 900 °C.

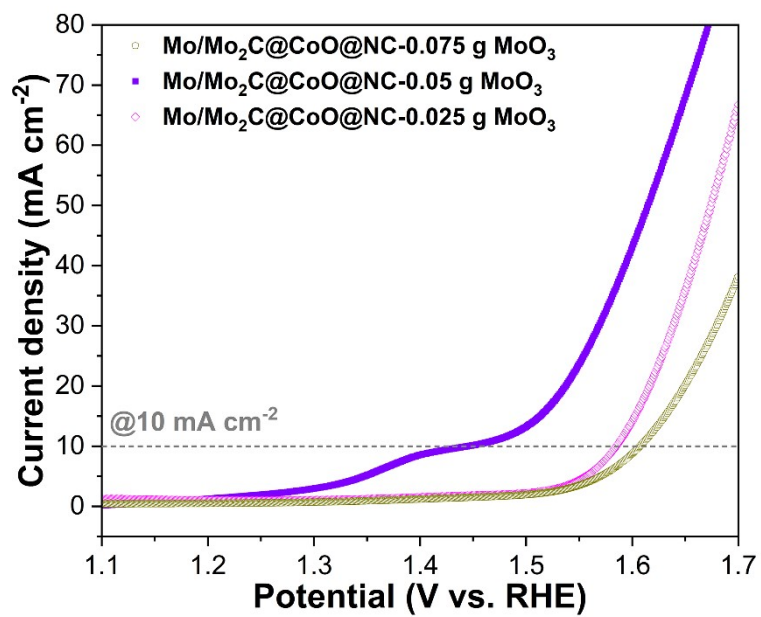

**Figure S15.** OER LSV polarization curves of Mo/Mo<sub>2</sub>C@CoO@NC heterostructure with 0.025 g, 0.05 g, and 0.075 g MoO<sub>3</sub>.

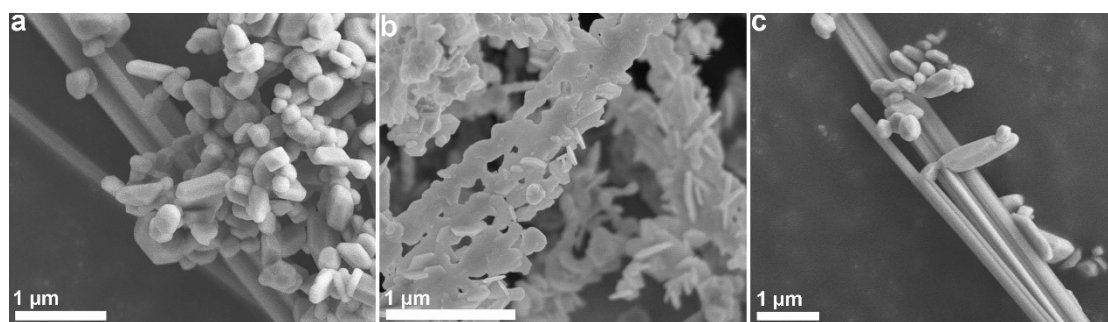

**Figure S16.** SEM images of Mo/Mo<sub>2</sub>C@CoO@NC heterostructure with (a) 0.025 g, (b) 0.05 g, and (c) 0.075 g MoO<sub>3</sub>.

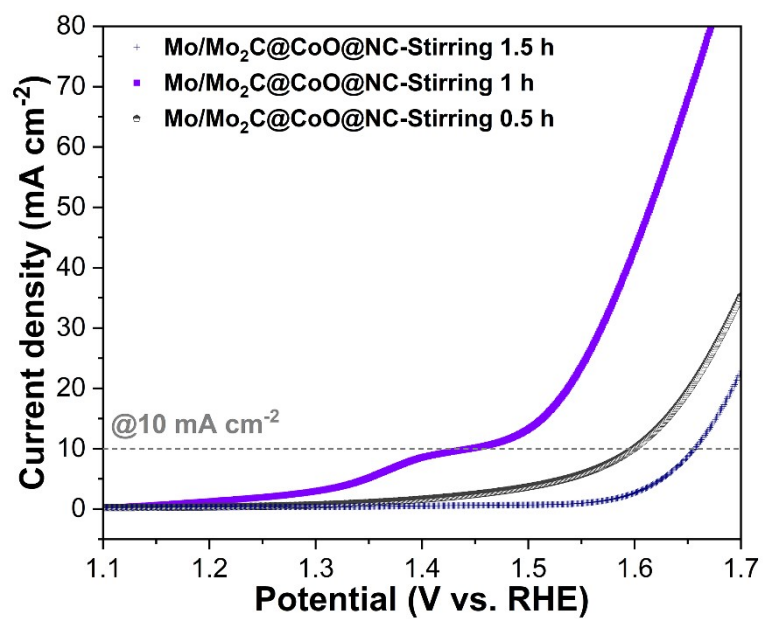

**Figure S17.** OER LSV polarization curves of Mo/Mo<sub>2</sub>C@CoO@NC heterostructure prepared with stirring time of 0.5 h, 1 h, and 1.5 h.

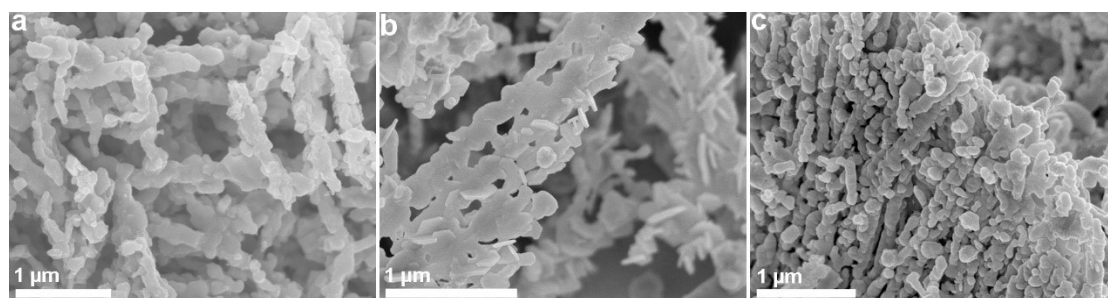

**Figure S18.** SEM images of Mo/Mo<sub>2</sub>C@CoO@NC heterostructure prepared with stirring time of (a) 0.5 h, (b) 1 h, and (c) 1.5 h.

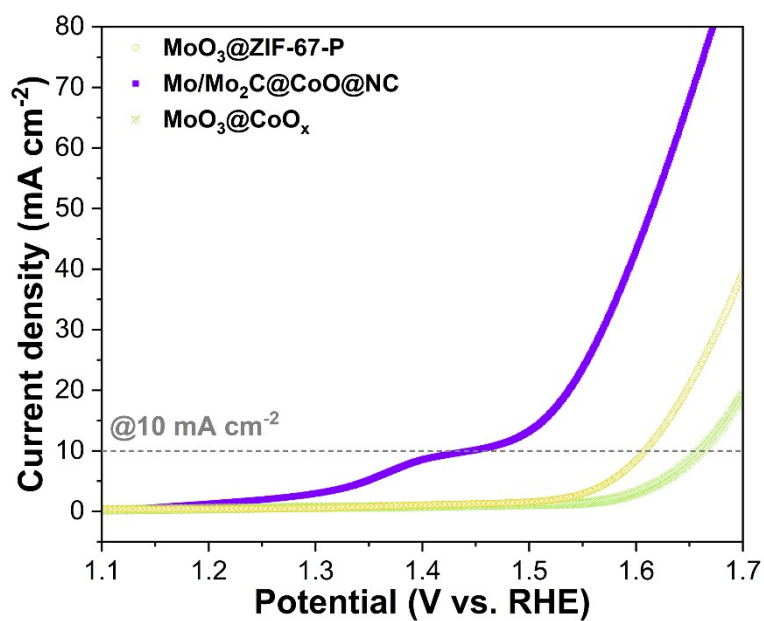

**Figure S19.** OER LSV polarization curves of MoO<sub>3</sub>@ZIF-67 heterogeneous nanoribbons heat-treated in different conditions.

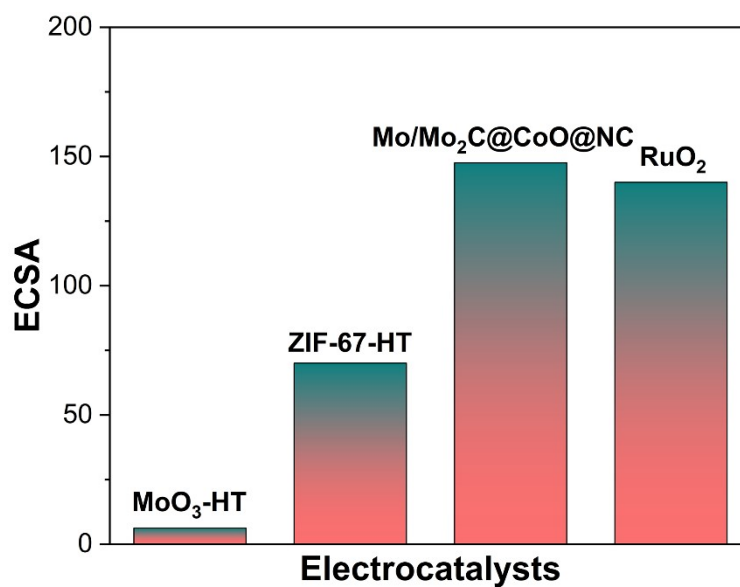

**Figure S20.** ECSA of MoO<sub>3</sub>-HT, ZIF-67-HT, Mo/Mo<sub>2</sub>C@CoO@NC, and RuO<sub>2</sub>.

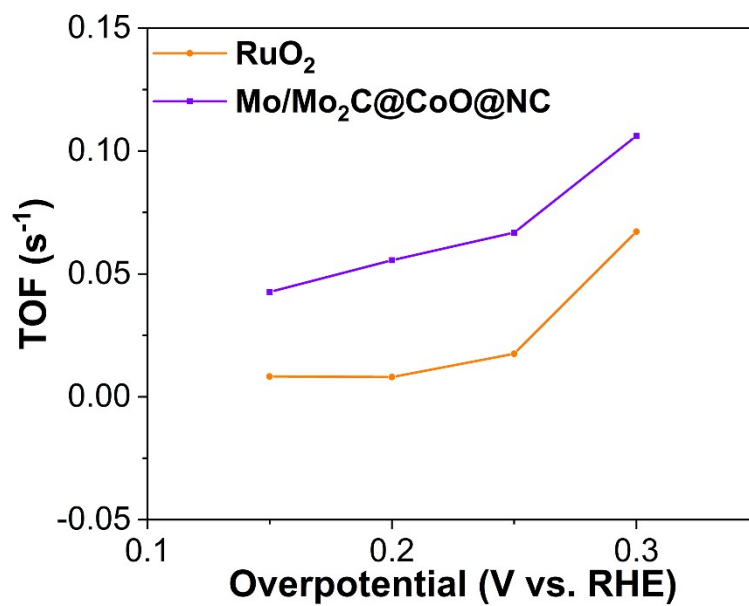

**Figure S21.** TOF of Mo/Mo<sub>2</sub>C@CoO@NC and RuO<sub>2</sub>.

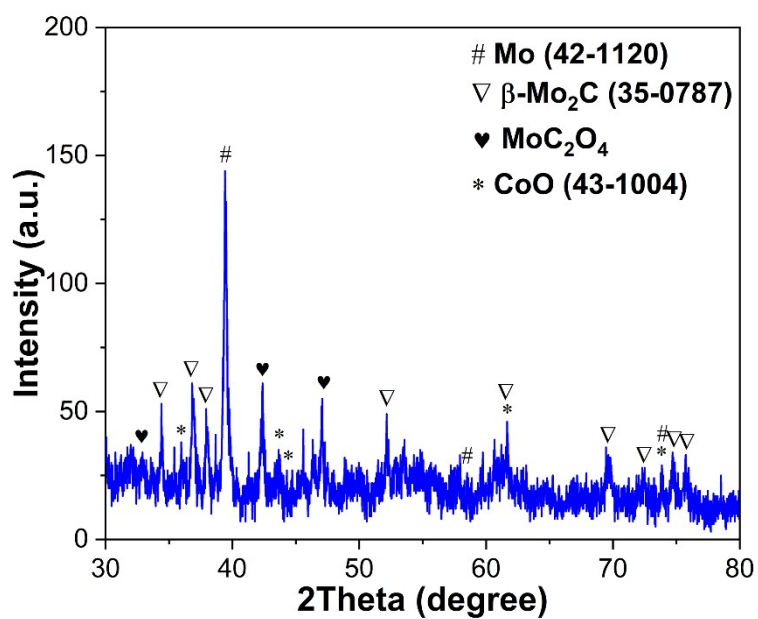

**Figure S22.** XRD patterns of Mo/Mo<sub>2</sub>C@CoO@NC heterostructures after chronoamperometry.

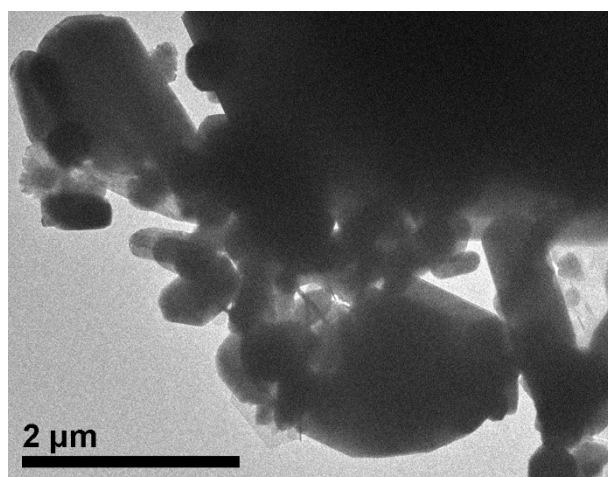

**Figure S23.** TEM images of Mo/Mo<sub>2</sub>C@CoO@NC heterostructures after chronoamperometry.

**Table S1.** Element contents in Mo/Mo<sub>2</sub>C@CoO@NC heterostructure detected by XPS technique.

| Samples                     | Mo (At.%) | Co (At.%) | N (At.%) | C (At.%) | O (At.%) |
|-----------------------------|-----------|-----------|----------|----------|----------|
|                             | 11.66     | 4.6       | 25.96    | 24.62    | 33.16    |
| Mo/Mo <sub>2</sub> C@CoO@NC | Mo (wt.%) | Co (wt.%) | N (wt.%) | C (wt.%) | O (wt.%) |
|                             | 43.37     | 10.51     | 14.09    | 11.46    | 20.57    |

**Table S2.** Electrocatalytic performances toward OER of Mo/Mo<sub>2</sub>C@CoO@NC and recently advanced non-noble-based OER electrocatalysts.

| Electrocatalysts                        | Loading (mg cm <sup>-2</sup> ) | OER $\eta$ (mV) @10 mA cm <sup>-2</sup> | Electrolyte | Ref. |
|-----------------------------------------|--------------------------------|-----------------------------------------|-------------|------|
| ACTP5@Co,N-800                          | 0.30                           | 374                                     | 0.1 M KOH   | [2]  |
| CoV <sub>2</sub> O <sub>6</sub>         | 0.23                           | 360                                     | 1 M KOH     | [3]  |
| BP-CN-c                                 | 0.50                           | 350                                     | 1 M KOH     | [4]  |
| MnSAC                                   | 0.10                           | 350                                     | 0.1 M KOH   | [5]  |
| CoNi <sub>40</sub> -MOFNs@MXene         | 0.20                           | 346                                     | 1 M KOH     | [6]  |
| GNiPy350N                               | -                              | 320                                     | 1 M KOH     | [7]  |
| CoFe PBA@CoP/NF                         | -                              | 312                                     | 1 M KOH     | [8]  |
| Fe-Co-CN/rGO-700                        | 0.25                           | 308                                     | 1 M KOH     | [9]  |
| Mo <sub>2</sub> C/Co@NC                 | 1.00                           | 308                                     | 1 M KOH     | [10] |
| CoSA/N,S-HCS                            | 1.50                           | 306                                     | 1 M KOH     | [11] |
| LC-CoOOH NAs/CFC                        | -                              | 294                                     | 1 M KOH     | [12] |
| P-Co <sub>3</sub> O <sub>4</sub>        | 0.30                           | 290                                     | 1 M KOH     | [13] |
| Vo-MnCo <sub>2</sub> O <sub>4</sub>     | 0.40                           | 290                                     | 1 M KOH     | [14] |
| FeNi <sub>2</sub> S <sub>4</sub> NPs/CB | 0.10                           | 290                                     | 1 M KOH     | [15] |
| FeNi-Mo <sub>2</sub> C/C                | 0.07                           | 288                                     | 1 M KOH     | [16] |
| NiFeP/MXene                             | 0.25                           | 286                                     | 1 M KOH     | [17] |



|                                                                 |      |     |         |           |
|-----------------------------------------------------------------|------|-----|---------|-----------|
| Ni/Ni <sub>2</sub> P@N-CNF                                      | 0.25 | 285 | 1 M KOH | [18]      |
| P <sub>30</sub> -doped Fe/NF                                    | -    | 284 | 1 M KOH | [19]      |
| Co/CoO@COF                                                      | 0.26 | 278 | 1 M KOH | [20]      |
| NiCo <sub>2-x</sub> Fe <sub>x</sub> O <sub>4</sub>              | 0.50 | 274 | 1 M KOH | [21]      |
| Fe <sub>0.4</sub> Co <sub>0.6</sub> Se <sub>2</sub>             |      | 270 | 1 M KOH | [22]      |
| Co-MOF-NK                                                       | 1.00 | 268 | 1 M KOH | [23]      |
| Co <sub>2</sub> P@Ti <sub>3</sub> C <sub>2</sub> T <sub>x</sub> | 5.70 | 267 | 1 M KOH | [24]      |
| NiCo LDH-TPA                                                    | 2.00 | 267 | 1 M KOH | [25]      |
| Co(OH) <sub>2</sub> /NiMo CA@CC                                 | -    | 267 | 1 M KOH | [26]      |
| NiFe <sub>0.2</sub> -O <sub>x</sub> H <sub>y</sub>              | 0.20 | 263 | 1 M KOH | [27]      |
| Fe-Co-O/Co@NC-mNS/NF                                            | -    | 257 | 1 M KOH | [28]      |
| NiFeLDH-Bir                                                     | 2.50 | 258 | 6 M KOH | [29]      |
| NiFe-MOF/G                                                      | 0.30 | 258 | 1 M KOH | [30]      |
| NiFeLa-LDH/v-MXene                                              | -    | 255 | 1 M KOH | [31]      |
| FeNi-LDH-V <sub>2</sub> C MXene                                 | 0.35 | 250 | 1 M KOH | [32]      |
| NiPS <sub>3-x</sub> Se <sub>x</sub>                             | 1.00 | 250 | 1 M KOH | [33]      |
| Co-C@NiFe LDH                                                   | 0.82 | 249 | 1 M KOH | [34]      |
| NiFe LDH/NF-IH                                                  | -    | 246 | 1 M KOH | [35]      |
| FeS <sub>2</sub> @MXene                                         | 1.00 | 240 | 1 M KOH | [36]      |
| Fe-CoP                                                          | -    | 237 | 1 M KOH | [37]      |
| Ni <sub>8</sub> Fe <sub>2</sub> -MI/OH                          | 0.26 | 229 | 1 M KOH | [38]      |
| (Ni <sub>x</sub> Fe <sub>1-x</sub> ) <sub>2</sub> P@pc/PG       | 2.40 | 220 | 1 M KOH | [39]      |
| a-LNFBPO@Ni                                                     | 3.00 | 215 | 1 M KOH | [40]      |
| Mo/Mo <sub>2</sub> C@CoO@NC                                     | 0.20 | 215 | 1 M KOH | This work |
| CIF:FeNiMo-II                                                   | 1.00 | 203 | 1 M KOH | [41]      |
| Ni <sub>0.9</sub> Fe <sub>0.1</sub> -MOF                        | 0.20 | 198 | 1 M KOH | [42]      |

---

## References

- [1] Wang J. J.; Zeng, H. C. Hybrid OER electrocatalyst combining mesoporous hollow spheres of N, P-doped carbon with ultrafine  $\text{Co}_2\text{NiO}_x$ . *ACS Appl. Mater. Interfaces* **2020**, *12*, 50324–50332.
- [2] Zhang, J. T.; Zhang, T.; Ma, J.; Wang, Z.; Liu, J. H.; Gong, X. Z. ORR and OER of Co-N codoped carbon-based electrocatalysts enhanced by boundary layer oxygen molecules transfer. *Carbon* **2021**, *172*, 556–568.
- [3] Mondal, A.; Ganguli, S.; Inta, H. R.; Mahalingam, V. Influence of Vanadate Structure on Electrochemical Surface Reconstruction and OER Performance of  $\text{CoV}_2\text{O}_6$  and  $\text{Co}_3\text{V}_2\text{O}_8$ . *ACS Appl. Energy Mater.* **2021**, *4*, 6, 5381–5387.
- [4] Wang, X.; Raghupathy, R. K. M.; Querebillo, C. J.; Liao, Z. Q.; Li, D. Q.; Lin, K.; Hantusch, M.; Sofer, Z.; Li, B. H.; Zschech, Z.; Weidinger, I. M.; Kühne, T. D.; Mirhosseini, H.; Yu, M. H.; Feng, X. L. Interfacial Covalent Bonds Regulated Electron-Deficient 2D Black Phosphorus for Electrocatalytic Oxygen Reactions. *Adv. Mater.* **2021**, *33*, 2008752.
- [5] Shang, H. S.; Sun, W. M.; Sui, R.; Pei, J. J.; Zheng, L. R.; Dong, J. C.; Jiang, Z. L.; Zhou, D. N.; Zhuang, Z. B.; Chen, W. X.; Zhang, J. T.; Wang, D. S.; Li, Y. D. Engineering Isolated Mn- $\text{N}_2\text{C}_2$  Atomic Interface Sites for Efficient Bifunctional Oxygen Reduction and Evolution Reaction. *Nano Lett.* **2020**, *20*, 5443–5450.
- [6] Du, C.-F.; Song, Q. Q.; Liang, Q. H.; Zhao, X. Y.; Wang, J. J.; Zhi, R. C.; Wang, Y. X.; Yu, H. The Passive Effect of MXene on Electrocatalysis: A Case of  $\text{Ti}_3\text{C}_2\text{T}_x/\text{CoNi-MOF}$  nanosheets for Oxygen Evolution Reaction. *ChenNanoMat* **2021**,

7, 539–544.

[7] Souza, A. S.; Bezerra, L. S.; Cardoso, E. S. F.; Fortunato, G. V.; Maia, G. Nickel pyrophosphate combined with graphene nanoribbon used as efficient catalyst for OER. *J. Mater. Chem. A* **2021**, *9*, 11255–11267.

[8] Quan, L.; Li, S. H.; Zhao, Z. P.; Liu, J. Q.; Ran, Y.; Cui, J. Y.; Lin, W.; Yu, X. L.; Wang, L.; Zhang, Y. H.; Ye, J. H. Hierarchically Assembling CoFe Prussian Blue Analogue Nanocubes on CoP Nanosheets as Highly Efficient Electrocatalysts for Overall Water Splitting. *Small Methods* **2021**, 2100125.

[9] Fang, W. H.; Wang, J.; Hu, Y.; Cui, X. Q.; Zhu, R. F.; Zhang, Y. H.; Yue, C. C.; Dang, J. Q.; Cui, W.; Zhao, H.; Li, Z. X. Metal-Organic Framework Derived Fe-Co-CN/Reduced Graphene Oxide for Efficient HER and OER. *Electrochim. Acta* **2021**, *365*, 137384.

[10] Gu, T. T.; Sa, R. J.; Zhang, L. J.; Li, D. S.; Wang, R. H. Engineering interfacial coupling between Mo<sub>2</sub>C nanosheets and Co@NC polyhedron for boosting electrocatalytic water splitting and zinc-air batteries. *Appl. Catal. B* **2021**, *296*, 120360.

[11] Zhang, Z. Y.; Zhao, X. X.; Xi, S. B.; Zhang, L. L.; Chen, Z. X.; Zeng, Z. P.; Huang, M.; Yang, H. B.; Liu, B.; Pennycook, S. J.; Chen, P. Atomically Dispersed Cobalt Trifunctional Electrocatalysts with Tailored Coordination Environment for Flexible Rechargeable Zn-Air Battery and Self-Driven Water Splitting. *Adv. Energy Mater.* **2020**, *10*, 2002896.

[12] Ye, S. H.; Wang, J. P.; Hu, J.; Chen, Z. D.; Zheng, L. R.; Fu, Y. H.; Lei, Y. Q.;

Ren, X. Z.; He, C. X.; Zhang, Q. L.; Liu, J. H. Electrochemical Construction of Low-Crystalline CoOOH Nanosheets with Short-Range Ordered Grains to Improve Oxygen Evolution Activity. *ACS Catal.* **2021**, *11*, 6104–6112.

[13] Lu, Y.; Li, C. J.; Zhang, Y.; Cao, X.; Xie, G.; Wang, M. L.; Peng, D. D.; Huang, K.; Zhang, B. W.; Wang, T.; Wu, J. S.; Huang, Y. Z. Engineering of cation and anion vacancies in Co<sub>3</sub>O<sub>4</sub> thin nanosheets by laser irradiation for more advancement of oxygen evolution reaction. *Nano Energy* **2021**, *83*, 105800.

[14] Zeng, K.; Li, W.; Zhou, Y.; Sun, Z. H.; Lu, C. Y.; Yan, J.; Choi, J. H.; Yang, R. Z. Multilayer Hollow MnCo<sub>2</sub>O<sub>4</sub> Microsphere with Oxygen Vacancies as Efficient Electrocatalyst for Oxygen Evolution Reaction. *Chem. Eng. J.* **2021**, *421*, 127831.

[15] Jiang, J.; Zhang, Y. J.; Zhu, X. J.; Lu, S.; Long, L. L.; Chen, J. J. Nanostructured metallic FeNi<sub>2</sub>S<sub>4</sub> with reconstruction to generate FeNi-based oxide as a highly-efficient oxygen evolution electrocatalyst. *Nano Energy* **2021**, *81*, 105619.

[16] Wang, M.; Wang, Y. Q.; Mao, S. S.; Shen, S. H. Transition-metal alloy electrocatalysts with active sites modulated by metal-carbide heterophases for efficient oxygen evolution. *Nano Energy* **2021**, *88*, 106216.

[17] Chen, J. X.; Long, Q. W.; Xiao, K.; Ouyang, T.; Li, N.; Ye, S. Y.; Liu, Z.-Q. Vertically-interlaced NiFeP/MXene electrocatalyst with tunable electronic structure for high-efficiency oxygen evolution reaction. *Sci. Bull.* **2021**, *66*, 1063–1072.

[18] Li, X. G.; Zhou, J. H.; Liu, C.; Xu, L.; Lu, C. L.; Yang, J.; Pang, H.; Hou, W. H. Encapsulation of Janus-structured Ni/Ni<sub>2</sub>P nanoparticles within hierarchical wrinkled N-doped carbon nanofibers: Interface engineering induces high-efficiency water

oxidation. *Appl. Catal. B* **2021**, *298*, 120578.

[19] Ju, Y.; Feng, S. Y.; Wang, X. B.; Li, M.; Wang, L.; Xu, R. D.; Wang, J. L. Facile Preparation of a Porous Nanosheet PX-Doped Fe BiFunctional Catalyst with Excellent OER and HER Electrocatalytic Activity. *ChemistrySelect* **2021**, *6*, 4979–4990.

[20] Ye, X. Q.; Fan, J. C.; Min, Y. L.; Shi, P. H.; Xu, Q. J. Synergistic Effect of Co/CoO Nanoparticles on Imine-based Covalent Organic Framework for Enhanced OER Performance. *Nanoscale* **2021**, *13*, 14854–14865.

[21] Huang, Y.; Zhang, S. L.; Lu, X. F.; Wu, Z. P.; Luan, D. Y.; Lou, X. W. Trimetallic Spinel NiCo<sub>2-x</sub>Fe<sub>x</sub>O<sub>4</sub> Nanoboxes for Highly Efficient Electrocatalytic Oxygen Evolution. *Angew. Chem. Int. Ed.* **2021**, *60*, 11841–11846.

[22] Zhang, J. Y.; Yan, Y.; Mei, B. B.; Qi, R. J.; He, T.; Wang, Z. T.; Fang, W. S.; Zaman, S.; Su, Y. Q.; Ding, S. J.; Xia, B. Y. Local spin-state tuning of cobalt-iron selenide nanoframes for the boosted oxygen evolution. *Energy Environ. Sci.* **2021**, *14*, 365–373.

[23] Liu, M.; Kong, L. J.; Wang, X. M.; He, J.; Zhang, J. J.; Zhu, J.; Bu, X. H. Deciphering of advantageous electrocatalytic water oxidation behavior of metal-organic framework in alkaline media. *Nano Res.* **2021**, 1–9.

[24] Lv, Z. P.; Ma, W. S.; Dang, J.; Wang, M.; Jian, K. L.; Liu, D.; Huang, D. J. Induction of Co<sub>2</sub>P Growth on a MXene (Ti<sub>3</sub>C<sub>2</sub>T<sub>x</sub>)-Modified Self-Supporting Electrode for Efficient Overall Water Splitting. *J. Phys. Chem. Lett.* **2021**, *12*, 4841–4848.

[25] Liu, W. X.; Zheng, D.; Deng, T. Q.; Chen, Q. L.; Zhu, C. Z.; Pei, C. J.; Li, H.; Wu, F. F.; Shi, W. H.; Yang, S. W.; Zhu, Y. H.; Cao, X. H. Boosting Electrocatalytic

- Activity of 3d-Block Metal (Hydro)oxides by Ligand-Induced Conversion. *Angew. Chem. Int. Ed.* 2021, 60, 10614–10619.
- [26] Zhang, Q.; Xiao, W.; Guo, W. H.; Yang, Y. X.; Lei, J. L.; Luo, H. Q.; Li, N. B. Macroporous Array Induced Multiscale Modulation at the Surface/Interface of Co(OH)<sub>2</sub>/NiMo Self-Supporting Electrode for Effective Overall Water Splitting. *Adv. Funct. Mater.* **2021**, 2102117.
- [27] Kuang, Z. C.; Liu, S.; Li, X. N.; Wang, M.; Ren, X. Y.; Ding, J.; Ge, R.; Zhou, W. H.; Rykov, A. L.; Sougrati, M. T.; Lippens, P. E.; Huang, Y. Q.; Wang, J. H. Topotactically constructed nickel-iron (oxy)hydroxide with abundant in-situ produced high-valent iron species for efficient water oxidation. *J. Energy Chem.* 2021, 57, 212–218.
- [28] Singh, T. I.; Rajeshkhanna, G.; Pan, U. N.; Kshetri, T.; Lin, H.; Kim, N. H.; Lee, J. H. Alkaline Water Splitting Enhancement by MOF-Derived Fe-Co-Oxide/Co@NC-mNS Heterostructure: Boosting OER and HER through Defect Engineering and In Situ Oxidation. *Small* **2021**, 17, 2101312.
- [29] Chen, Z. W.; Ju, M.; Sun, M. Z.; Jin, L.; Cai, R. M.; Wang, Z.; Dong, L.; Peng, L. M.; Long, X.; Huang, B. L.; Yang, S. H. TM LDH Meets Birnessite: A 2D-2D Hybrid Catalyst with Long-Term Stability for Water Oxidation at Industrial Operating Conditions. *Angew. Chem. Int. Ed.* **2021**, 60, 9699–9705.
- [30] Wang, Y.; Liu, B. R.; Shen, X. J.; Arandiyana, H.; Zhao, T. W.; Li, Y. B.; Garbrecht, M.; Su, Z.; Han, L.; Tricoli, A.; Zhao, C. Oxygen Evolution Reaction: Engineering the Activity and Stability of MOF-Nanocomposites for Efficient Water Oxidation. *Adv.*

*Energy Mater.* **2021**, *11*, 2003759.

[31] Yu, M. Z.; Zheng, J. Q.; Guo, M. La-doped NiFe-LDH coupled with hierarchical vertically aligned MXene frameworks for efficient overall water splitting. *J. Energy Chem.* **2022**, *70*, 472–479.

[32] Chen, Y. F.; Yao, H. L.; Kong, F. T.; Tian, H.; Meng, G.; Wang, S. Z.; Mao, X. P.; Cui, X. Z.; Hou, X. M.; Shi, J. L. MXene-induced electronic optimization of metal-organic framework-derived CoFe LDH nanosheet arrays for efficient oxygen evolution. *Appl. Catal. B* **2021**, *297*, 120474.

[33] Song, J. N.; Qiu, S. Y.; Hu, F.; Ding, Y. H.; Han, S. L.; Li, L. L.; Chen, H. Y.; Han, X. P.; Sun, C. H.; Peng, S. J. Sub-2 nm Thiophosphate Nanosheets with Heteroatom Doping for Enhanced Oxygen Electrocatalysis. *Adv. Funct. Mater.* **2021**, *31*, 2100618.

[34] Li, W. M.; Chen, S. H.; Zhong, M. X.; Wang, C.; Lu, X. F. Synergistic coupling of NiFe layered double hydroxides with Co-C nanofibers for high-efficiency oxygen evolution reaction. *Chem. Eng. J.* **2021**, *415*, 128879.

[35] Xiong, G. W.; Chen, Y. K.; Zhou, Z. Q.; Liu, F.; Liu, X. Y.; Yang, L.J.; Liu, Q. L.; Sang, Y. H.; Liu, H.; Zhang, X. L.; Jia, J.; Zhou, W. J. Rapid Synthesis of Various Electrocatalysts on Ni Foam Using a Universal and Facile Induction Heating Method for Efficient Water Splitting. *Adv. Funct. Mater.* **2021**, *31*, 2009580.

[36] Xie, Y. Y.; Yu, H. Z.; Deng, L. M.; Amin, R. S.; Yu, D. S.; Fetohi, A. E.; Maximov, M. Yu.; Li, L. L.; El-Khatib, K. M.; Peng, S. J. Anchoring stable FeS<sub>2</sub> nanoparticles on MXene nanosheets *via* interface engineering for efficient water splitting. *Inorg. Chem.*

*Front.* **2022**, *9*, 662–669.

[37] Yu, X. W.; Zhao, J.; Johnsson, M. Interfacial Engineering of Nickel Hydroxide on Cobalt Phosphide for Alkaline Water Electrocatalysis. *Adv. Funct. Mater.* **2021**, *31*, 2101578.

[38] Huang, W. Z.; Chen, C. X.; Ling, Z. H.; Li, J. T.; Qu, L. B.; Zhu, J. X.; Yang, W.; Wang, M. M.; Owusu, K. A.; Qin, L.; Zhou, L.; Mai, L. Q. Ni/Fe based bimetallic coordination complexes with rich active sites for efficient oxygen evolution reaction. *Chem. Eng. J.* **2021**, *405*, 126959.

[39] Wang, L.; Fan, J. Y.; Liu, Y.; Chen, M. Y.; Lin, Y.; Bi, H. C.; Liu, B. X.; Shi, N. E.; Xu, D. D.; Bao, J. C.; Han, M. Phase-Modulation of Iron/Nickel Phosphides Nanocrystals “Armored” with Porous P-Doped Carbon and Anchored on P-Doped Graphene Nanohybrids for Enhanced Overall Water Splitting. *Adv. Funct. Mater.* **2021**, *31*, 2010912.

[40] Kwon, J.; Han, H.; Jo, S.; Choi, S.; Chung, K. Y.; Ali, G.; Park, K.; Paik, U.; Song, T. Amorphous Nickel-Iron Borophosphate for a Robust and Efficient Oxygen Evolution Reaction. *Adv. Energy Mater.* **2021**, *11*, 2100624.

[41] Choi, W. H.; Kim, K. H.; Lee, H.; Choi, J.W.; Park, D. G.; Kim, G. H.; Choi, K. M.; Kang, J. K. Metal-Organic Fragments with Adhesive Excipient and Their Utilization to Stabilize Multimetallic Electrocatalysts for High Activity and Robust Durability in Oxygen Evolution Reaction. *Adv. Sci.* **2021**, *8*, 2100044.

[42] Zhao, S. L.; Tan, C. H.; He, C. T.; An, P. F.; Xie, F.; Jiang, S.; Wu, K. H.; Zhang, B. W.; Li, H. J.; Zhang, J.; Chen, Y.; Liu, S. Q.; Dong, J. C.; Tang, Z. Y. Structural



transformation of highly active metal-organic framework electrocatalysts during the oxygen evolution reaction. *Nat. Energy* **2020**, *5*, 881–890.
